# Supplementary material
Source: HighWire-hosted journal article supplement (https://bmjopenrespres.bmj.com/content/suppl/2020/03/18/7.1.e000534)
Supplement: bmjresp-2019-000534supp001_data_supplement.pdf [file bmjresp-2019-000534supp001_data_supplement.pdf]

## Supplemental Materials

**Supplemental Table S1.** Adjusted mean SF-36 scores by ACT score in patients with asthma

|                              | Mean (standard error)       |                             |                           |
|------------------------------|-----------------------------|-----------------------------|---------------------------|
|                              | ACT score 20–25<br>(n=4888) | ACT score 16–19<br>(n=1572) | ACT score ≤15<br>(n=1360) |
| <b>SF-36v2 MCS</b>           | 46.08 (0.16)                | 42.61* (0.28)               | 39.99* (0.30)             |
| SF-36v2 Vitality             | 47.03 (0.14)                | 44.26* (0.24)               | 43.22* (0.26)             |
| SF-36v2 Social functioning   | 46.87 (0.15)                | 42.78* (0.26)               | 39.03* (0.28)             |
| SF-36v2 Role-emotional       | 47.23 (0.16)                | 42.86* (0.29)               | 39.23* (0.31)             |
| SF-36v2 Mental health        | 46.64 (0.15)                | 43.45* (0.27)               | 41.00* (0.29)             |
| <b>SF-36v2 PCS</b>           | 49.41 (0.12)                | 45.91* (0.21)               | 43.30* (0.23)             |
| SF-36v2 Physical functioning | 49.67 (0.13)                | 46.25* (0.22)               | 43.30* (0.24)             |
| SF-36v2 Role-physical        | 48.86 (0.14)                | 44.62* (0.24)               | 41.23* (0.26)             |
| SF-36v2 Bodily Pain          | 47.92 (0.13)                | 44.14* (0.23)               | 41.40* (0.25)             |
| SF-36v2 General Health       | 47.57 (0.14)                | 44.18* (0.24)               | 42.02* (0.26)             |

\*P<0.001; P-values represent significance of the regression coefficient in the regression model with patients with well-controlled asthma (ACT score 20–25) as the reference group. Covariates included age, sex, Charlson Comorbidity Index, race/ethnicity, income, body mass index, smoking status, exercise, insurance type, and years diagnosed with asthma.

ACT, Asthma control test; MCS, mental component score; PCS, physical component score; SF-36v2, Short Form Health Survey-36 version 2.

Supplemental Figure S1. Flow diagram of data analysis

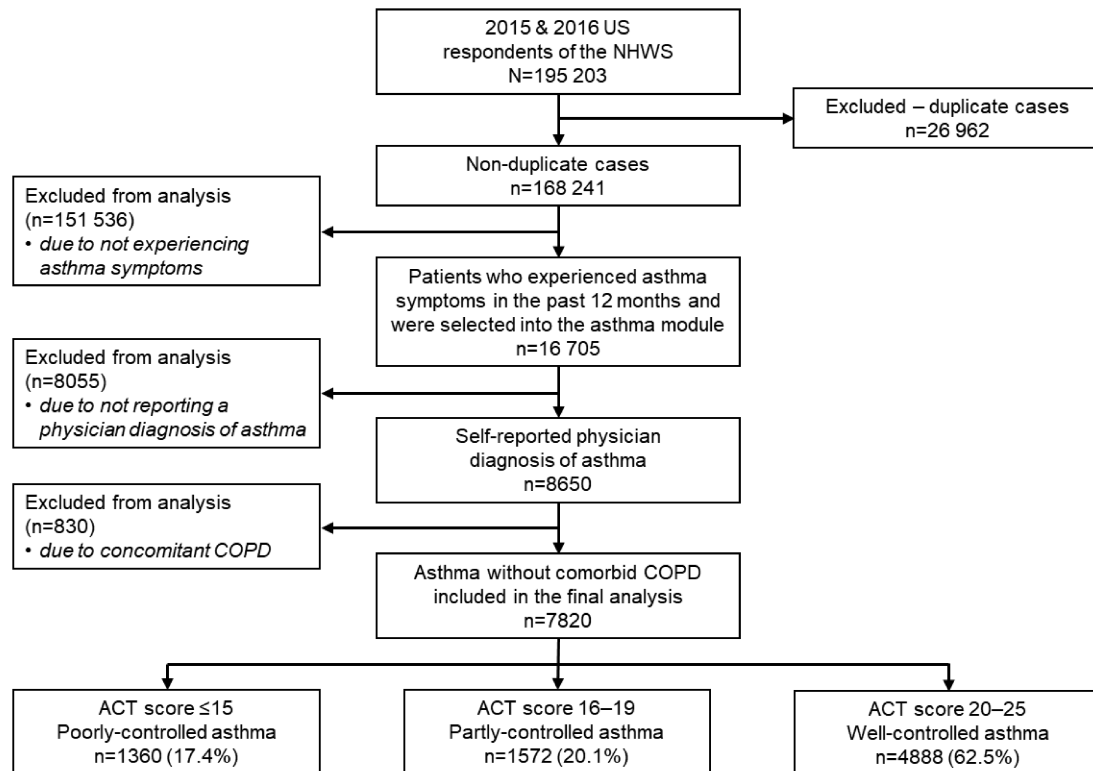

Notes: Among all US NHWS respondents, individuals with self-reported, physician-diagnosed asthma not reporting COPD were identified data set for analysis). This group was subdivided into respondents with poorly-controlled, partly-controlled and well-controlled asthma. Duplicate cases indicate that respondent data were available in both 2015 and 2016 survey years.

ACT, asthma control test; COPD, chronic obstructive pulmonary disorder; NHWS, National Health and Wellness Survey; US, United States.
